# Supplementary material for: Immunomodulatory and Antidiabetic Effects of a New Herbal Preparation (HemoHIM) on Streptozotocin‐Induced Diabetic Mice
Source: Hindawi journal article supplement (doi:10.1155/2014/461685), 2014-01-01
Supplement: f1 [file 461685.f1.pdf]

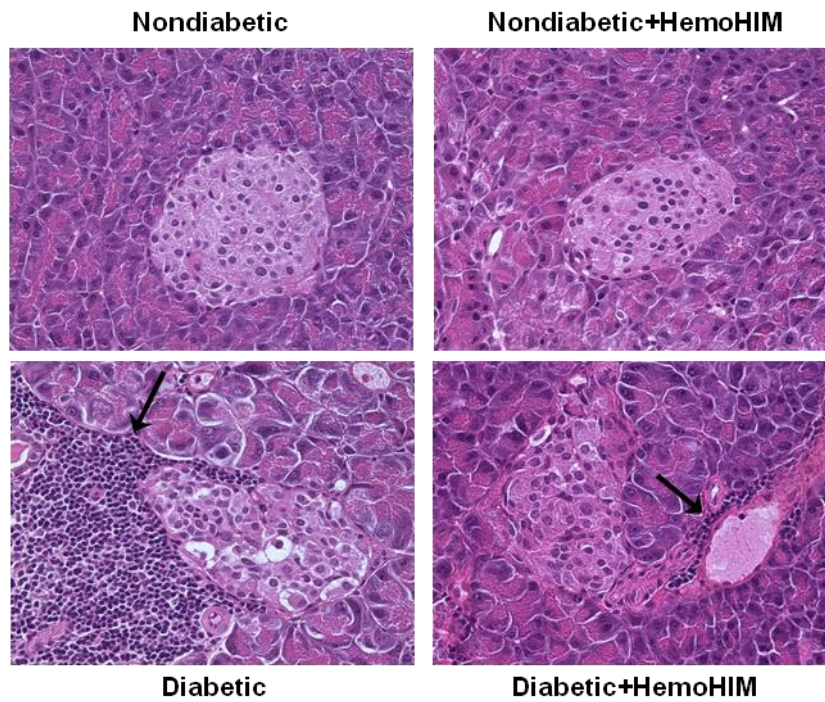

**Supplement figure 1.** Mouse pancreas was harvested and paraffin embedded after fixation in formalin. Four-micron sections were cut and stained with Hematoxylin & Eosin (H&E  $\times 400$ ). Nondiabetic and nondiabetic+HemoHIM mice were not detected infiltration of lymphocyte in the pancreas. Lymphocytes were infiltrated surrounding islet cells in the STZ-induced diabetic mice (black arrow). Interestingly, however, HemoHIM dramatically reduced infiltration of lymphocytes (black arrow).
